# Supplementary material
Source: PubMed Central journal article supplement (PMC7614809)

## Supplementary Appendices

These appendices have been provided by the authors to give readers additional information about their work.

Supplement to: Different independent associations of depression and anxiety with survival in patients with cancer

## **Appendix A: Social deprivation scores**

Social deprivation was calculated using the Scottish Index of Multiple Deprivation (SIMD) 2009.

This provides a relative measure of deprivation based on indicators from 7 domains – income, employment, health, education, access, housing and crime by dividing Scotland into 6,505 small geographical areas or divisions (datazones) and ranking these from the most deprived (ranked 1) to the least deprived (ranked 6,505).

### Reference

Office of the Chief Statistician. Scottish Index of Multiple Deprivation 2009 Technical Report: Scottish Government; 2011.

## Appendix B: Cancer groupings

| <b>Grouping</b> | <b>ICD-10 codes*</b> | <b>Diagnoses</b>                                     |
|-----------------|----------------------|------------------------------------------------------|
| <b>Breast</b>   | C500                 | Malignant neoplasm of nipple and areola              |
|                 | C501                 | Malignant neoplasm of central portion of breast      |
|                 | C502                 | Malignant neoplasm of upper-inner quadrant of breast |
|                 | C503                 | Malignant neoplasm of lower-inner quadrant of breast |
|                 | C504                 | Malignant neoplasm of upper-outer quadrant of breast |
|                 | C505                 | Malignant neoplasm of lower-outer quadrant of breast |
|                 | C506                 | Malignant neoplasm of axillary tail of breast        |
|                 | C508                 | Malignant neoplasm, overlapping lesion of breast     |
|                 | C509                 | Malignant neoplasm of breast, unspecified            |
|                 |                      |                                                      |
| <b>Lung</b>     | C340                 | Malignant neoplasm of main bronchus                  |
|                 | C341                 | Malignant neoplasm of upper lobe, bronchus or lung   |
|                 | C342                 | Malignant neoplasm of middle lobe, bronchus or lung  |
|                 | C343                 | Malignant neoplasm of lower lobe, bronchus or lung   |
|                 | C348                 | Malignant neoplasm of overlap les of bronchus & lung |
|                 | C349                 | Malignant neoplasm of bronchus or lung, unspecified  |
|                 | C450                 | Mesothelioma of pleura                               |
|                 | C451                 | Mesothelioma of peritoneum                           |
|                 | C452                 | Mesothelioma of pericardium                          |
|                 | C457                 | Mesothelioma of other sites                          |
|                 | C459                 | Mesothelioma, unspecified                            |

|                       |      |                                                        |
|-----------------------|------|--------------------------------------------------------|
|                       |      |                                                        |
| <b>Colorectal</b>     | C182 | Malignant neoplasm of ascending colon                  |
|                       | C183 | Malignant neoplasm of hepatic flexure                  |
|                       | C184 | Malignant neoplasm of transverse colon                 |
|                       | C185 | Malignant neoplasm of splenic flexure                  |
|                       | C186 | Malignant neoplasm of descending colon                 |
|                       | C187 | Malignant neoplasm of sigmoid colon                    |
|                       | C188 | Malignant neoplasm overlapping lesion of colon         |
|                       | C189 | Malignant neoplasm of colon, unspecified               |
|                       | C19X | Malignant neoplasm of rectosigmoid junction            |
|                       | C20X | Malignant neoplasm of rectum                           |
|                       |      |                                                        |
| <b>Gynaecological</b> | C481 | Malignant neoplasm of specified parts of peritoneum    |
|                       | C482 | Malignant neoplasm of peritoneum, unspecified          |
|                       | C510 | Malignant neoplasm of labium majus                     |
|                       | C511 | Malignant neoplasm of labium minus                     |
|                       | C512 | Malignant neoplasm of clitoris                         |
|                       | C518 | Malignant neoplasm of overlapping lesion of vulva      |
|                       | C519 | Malignant neoplasm of vulva, unspecified               |
|                       | C52X | Malignant neoplasm of vagina                           |
|                       | C530 | Malignant neoplasm of endocervix                       |
|                       | C531 | Malignant neoplasm of exocervix                        |
|                       | C538 | Malignant neoplasm, overlapping lesion of cervix uteri |
|                       | C539 | Malignant neoplasm of cervix uteri, unspecified        |

|                 |      |                                                              |
|-----------------|------|--------------------------------------------------------------|
|                 | C540 | Malignant neoplasm of isthmus uteri                          |
|                 | C541 | Malignant neoplasm of endometrium                            |
|                 | C542 | Malignant neoplasm of myometrium                             |
|                 | C543 | Malignant neoplasm of fundus uteri                           |
|                 | C548 | Malignant neoplasm overlapping lesion of corpus uteri        |
|                 | C549 | Malignant neoplasm of corpus uteri, unspecified              |
|                 | C55X | Malignant neoplasm of uterus, part unspecified               |
|                 | C56X | Malignant neoplasm of ovary                                  |
|                 | C570 | Malignant neoplasm of fallopian tube                         |
|                 | C571 | Malignant neoplasm of broad ligament                         |
|                 | C572 | Malignant neoplasm of round ligament                         |
|                 | C573 | Malignant neoplasm of parametrium                            |
|                 | C574 | Malignant neoplasm of uterine adnexa, unspecified            |
|                 | C577 | Malignant neoplasm of other specified female genital organs  |
|                 | C578 | Malignant neoplasm, overlapping lesion female genital organs |
|                 | C579 | Malignant neoplasm of female genital organ, unspecified      |
|                 | C763 | Malignant neoplasm of pelvis                                 |
|                 |      |                                                              |
| <b>Prostate</b> | C61X | Malignant neoplasm of prostate                               |
|                 |      |                                                              |

\*International Classification of Diseases 10<sup>th</sup> edition

### Appendix C: Sunflower plot of HADS-Anxiety versus HADS-Depression scores

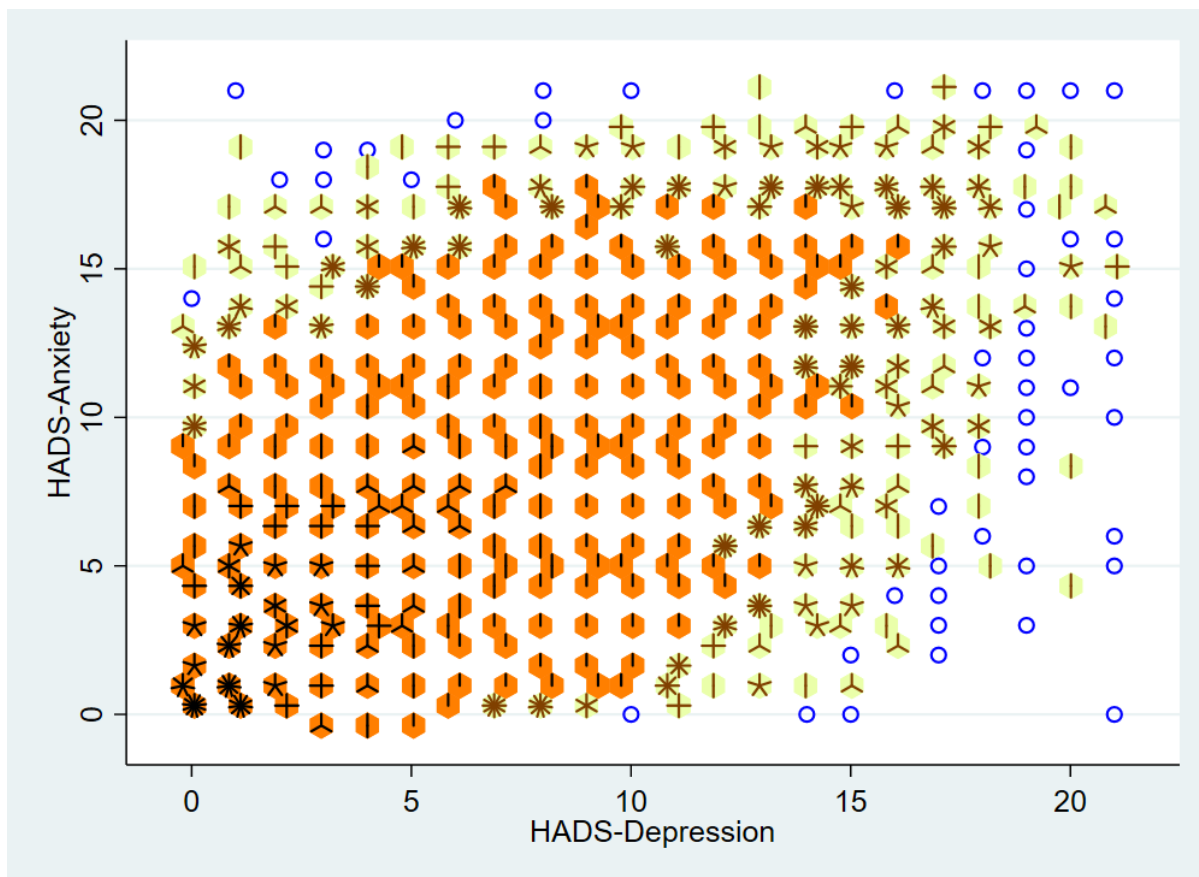

A blue circle represents one patient.

A light hexagon with: one vertical line (two radii) represents two patients, three radii represents three patients...12 radii represents 12 patients.

A dark hexagon with one radius represents 13 to 50 patients, two radii represents 51 to 100 patients etc.

## **Appendix D: The handling of missing data**

We imputed missing data using the substantive model compatible fully conditional specification (SMCFCS) method, an extension of the more common fully conditional specification (FCS). This method imputes missing data across multiple covariates using an imputation model that is fully compatible with our substantive (intended) analysis model. For our study this may be more appropriate than FCS because we have specified non-linear associations and interactions in our regression model, which cannot be completely specified in FCS imputation. The imputation models were specified with the substantive model variables plus extra variables that, over and above those in the substantive model both (1) predict the values of the missing data and (2) predict the probability of these data being missing. We determined this using logistic regression on the complete data where the outcome is the variable in question (1) or a 0/1 indicator of its missingness (2). We add to the imputation model those variables that were statistically significant at the 5% level for both. We included tumour grade and/or clinical stage marker (as available) for each cancer type where there was evidence that these were associated with both survival and missingness. We also did not include any of these extra variables in the substantive models for survival since we wanted to use a common set of covariates throughout in order to make the cancer-specific results comparable.

### References

Bartlett J. SMCFCS: Multiple Imputation of Covariates by Substantive Model Compatible Fully Conditional Specification. <https://CRAN.R-project.org/package=smcfcs2016>.

## Appendix E: Primary causes of death for patients included in the analysis

|                                                                 |                     |
|-----------------------------------------------------------------|---------------------|
| <b>Total number of deaths</b>                                   | <b>5884</b>         |
| <b>Cancer</b>                                                   | <b>5386 (91.5%)</b> |
| Lung                                                            | 2708                |
| Breast                                                          | 816                 |
| Gynaecological                                                  | 753                 |
| Colorectal                                                      | 665                 |
| Prostate                                                        | 214                 |
| Other cancer                                                    | 230                 |
| <b>Circulatory</b>                                              | <b>218 (3.7%)</b>   |
| Ischaemic heart disease (including acute myocardial infarction) | 111                 |
| Aortic aneurysm                                                 | 12                  |
| Cardiac arrhythmia                                              | 7                   |
| Cerebrovascular disease                                         | 59                  |
| Heart failure                                                   | 6                   |
| Other                                                           | 23                  |
| <b>Respiratory</b>                                              | <b>93 (1.6%)</b>    |
| Chronic obstructive airways disease                             | 56                  |
| Respiratory infection                                           | 25                  |
| Interstitial pulmonary disease                                  | 6                   |
| Other                                                           | 6                   |
| <b>Gastro-intestinal</b>                                        | <b>41 (0.7%)</b>    |
| <b>Infection (non-respiratory)</b>                              | <b>23 (0.4%)</b>    |
| <b>Injury, poisoning and external causes</b>                    | <b>21 (0.4%)</b>    |
| Fall                                                            | 10                  |
| Fracture                                                        | 3                   |



|                                            |                  |
|--------------------------------------------|------------------|
| Poisoning (accidental)                     | 4                |
| Road traffic accident                      | 1                |
| Drowning (undetermined intent)             | 1                |
| Shooting (intentional self-harm)           | 1                |
| Exposure to excessive cold                 | 1                |
| <b>Neurological</b>                        | <b>15 (0.3%)</b> |
| <b>Renal</b>                               | <b>12 (0.2%)</b> |
| <b>Haematological</b>                      | <b>12 (0.2%)</b> |
| <b>Hepatic, pancreatic or biliary</b>      | <b>12 (0.2%)</b> |
| <b>Endocrine, nutritional or metabolic</b> | <b>8 (0.1%)</b>  |
| <b>Mental and behavioural</b>              | <b>7 (0.1%)</b>  |
| Dementia                                   | 6                |
| Alcohol dependence                         | 1                |
| <b>Other</b>                               | <b>4 (0.1%)</b>  |
| <b>Unknown</b>                             | <b>32 (0.5%)</b> |

## Appendix F: Parameter estimates for the models relating HADS-D and HADS-A to mortality

### hazard

For HADS (either HADS-D or HADS-A), with knots at  $k_i, i = 1, \dots, 4$  define the restricted cubic spline variables to be created as HADS<sub>1</sub>, HADS<sub>2</sub> and HADS<sub>3</sub> as follows.

$$\text{HADS}_1 = \text{HADS}$$

$$\text{HADS}_{i+1}$$

$$= \frac{(\text{HADS} - k_i)_+^3 - (k_4 - k_3)^{-1} \{ (\text{HADS} - k_3)_+^3 (k_4 - k_i) - (\text{HADS} - k_4)_+^3 (k_3 - k_i) \}}{(k_4 - k_1)^2}$$

for  $i = 1, 2$  where  $(u)_+ = u$ , if  $u > 0$  or 0, if  $u \leq 0$ .

The estimated log hazard ratios, p-values and 95% confidence intervals (CI) for each of the cancer groupings are as follows:

### Prostate cancer

| Predictor variable                                      | Log hazard ratio | p-value | 95% CI      |
|---------------------------------------------------------|------------------|---------|-------------|
| <b>Unadjusted (n=1531 for HADS-D and HADS-A models)</b> |                  |         |             |
| HADS-D <sub>1</sub>                                     | 0.46             | p=0.008 | 0.12, 0.80  |
| HADS-D <sub>2</sub>                                     | -1.82            | p=0.122 | -4.14, 0.49 |
| HADS-D <sub>3</sub>                                     | 3.52             | p=0.167 | -1.48, 8.51 |
| HADS-A <sub>1</sub>                                     | 0.07             | p=0.532 | -0.16, 0.30 |
| HADS-A <sub>2</sub>                                     | -0.04            | p=0.966 | -1.76, 1.68 |
| HADS-A <sub>3</sub>                                     | 0.05             | p=0.976 | -3.12, 3.21 |
| <b>Adjusted (n=1531)</b>                                |                  |         |             |
| HADS-D <sub>1</sub>                                     | 0.49             | p=0.006 | 0.14, 0.84  |
| HADS-D <sub>2</sub>                                     | -1.92            | p=0.108 | -4.25, 0.42 |
| HADS-D <sub>3</sub>                                     | 3.66             | p=0.154 | -1.38, 8.71 |
| HADS-A <sub>1</sub>                                     | -0.08            | p=0.494 | -0.32, 0.16 |
| HADS-A <sub>2</sub>                                     | 0.43             | p=0.633 | -1.33, 2.18 |
| HADS-A <sub>3</sub>                                     | -0.70            | p=0.670 | -3.93, 2.52 |

### Colorectal cancer – males

| Predictor variable                                      | Log hazard ratio | p-value | 95% CI      |
|---------------------------------------------------------|------------------|---------|-------------|
| <b>Unadjusted (n=1573 for HADS-D and HADS-A models)</b> |                  |         |             |
| HADS-D <sub>1</sub>                                     | 0.09             | p=0.348 | -0.10, 0.28 |
| HADS-D <sub>2</sub>                                     | 0.15             | p=0.826 | -1.21, 1.51 |
| HADS-D <sub>3</sub>                                     | -0.40            | p=0.752 | -2.87, 2.07 |
| HADS-A <sub>1</sub>                                     | 0.03             | p=0.765 | -0.15, 0.20 |
| HADS-A <sub>2</sub>                                     | 0.50             | p=0.449 | -0.79, 1.78 |
| HADS-A <sub>3</sub>                                     | -1.03            | p=0.392 | -3.38, 1.32 |
| <b>Adjusted (n=1573)</b>                                |                  |         |             |
| HADS-D <sub>1</sub>                                     | 0.08             | p=0.408 | -0.11, 0.28 |
| HADS-D <sub>2</sub>                                     | 0.10             | p=0.890 | -1.28, 1.48 |
| HADS-D <sub>3</sub>                                     | -0.26            | p=0.838 | -2.77, 2.25 |
| HADS-A <sub>1</sub>                                     | -0.02            | p=0.821 | -0.20, 0.16 |
| HADS-A <sub>2</sub>                                     | 0.47             | p=0.484 | -0.84, 1.78 |
| HADS-A <sub>3</sub>                                     | -0.96            | p=0.431 | -3.36, 1.43 |

### Lung cancer – males

| Predictor variable                                      | Log hazard ratio | p-value | 95% CI      |
|---------------------------------------------------------|------------------|---------|-------------|
| <b>Unadjusted (n=2299 for HADS-D and HADS-A models)</b> |                  |         |             |
| HADS-D <sub>1</sub>                                     | 0.10             | p=0.002 | 0.04, 0.17  |
| HADS-D <sub>2</sub>                                     | -0.11            | p=0.498 | -0.41, 0.20 |
| HADS-D <sub>3</sub>                                     | 0.17             | p=0.601 | -0.47, 0.81 |
| HADS-A <sub>1</sub>                                     | 0.05             | p=0.175 | -0.02, 0.11 |
| HADS-A <sub>2</sub>                                     | -0.03            | p=0.858 | -0.32, 0.27 |
| HADS-A <sub>3</sub>                                     | 0.06             | p=0.895 | -0.79, 0.90 |
| <b>Adjusted (n=2299)</b>                                |                  |         |             |
| HADS-D <sub>1</sub>                                     | 0.11             | p=0.001 | 0.04, 0.18  |
| HADS-D <sub>2</sub>                                     | -0.12            | p=0.433 | -0.44, 0.19 |
| HADS-D <sub>3</sub>                                     | 0.20             | p=0.540 | -0.45, 0.85 |
| HADS-A <sub>1</sub>                                     | -0.03            | p=0.458 | -0.10, 0.04 |
| HADS-A <sub>2</sub>                                     | 0.09             | p=0.552 | -0.21, 0.39 |
| HADS-A <sub>3</sub>                                     | -0.24            | p=0.584 | -1.10, 0.62 |

**Breast cancer**

| Predictor variable                                      | Log hazard ratio | p-value | 95% CI       |
|---------------------------------------------------------|------------------|---------|--------------|
| <b>Unadjusted (n=8467 for HADS-D and HADS-A models)</b> |                  |         |              |
| HADS-D <sub>1</sub>                                     | 1.36             | p<0.001 | 1.15, 1.60   |
| HADS-D <sub>2</sub>                                     | 0.22             | p=0.011 | 0.07, 0.71   |
| HADS-D <sub>3</sub>                                     | 24.41            | p=0.013 | 1.95, 306.04 |
| HADS-A <sub>1</sub>                                     | 1.08             | p=0.077 | 0.99, 1.18   |
| HADS-A <sub>2</sub>                                     | 0.74             | p=0.084 | 0.53, 1.04   |
| HADS-A <sub>3</sub>                                     | 2.49             | p=0.068 | 0.94, 6.63   |
| <b>Adjusted (n=8467)</b>                                |                  |         |              |
| HADS-D <sub>1</sub>                                     | 1.41             | p<.001  | 1.19, 1.67   |
| HADS-D <sub>2</sub>                                     | 0.24             | p=0.018 | 0.07, 0.78   |
| HADS-D <sub>3</sub>                                     | 19.18            | p=0.024 | 1.49, 247.41 |
| HADS-A <sub>1</sub>                                     | 1.00             | p=0.935 | 0.92, 1.10   |
| HADS-A <sub>2</sub>                                     | 0.78             | p=0.156 | 0.56, 1.10   |
| HADS-A <sub>3</sub>                                     | 2.10             | p=0.144 | 0.78, 5.65   |

**Gynaecological cancer**

| Predictor variable                                      | Log hazard ratio | p-value | 95% CI       |
|---------------------------------------------------------|------------------|---------|--------------|
| <b>Unadjusted (n=2910 for HADS-D and HADS-A models)</b> |                  |         |              |
| HADS-D <sub>1</sub>                                     | 0.35             | p<.001  | 0.18, 0.51   |
| HADS-D <sub>2</sub>                                     | -1.65            | p=0.004 | -2.79, -0.51 |
| HADS-D <sub>3</sub>                                     | 2.85             | p=0.007 | 0.79, 4.92   |
| HADS-A <sub>1</sub>                                     | 0.06             | p=0.189 | -0.03, 0.15  |
| HADS-A <sub>2</sub>                                     | -0.07            | p=0.718 | -0.44, 0.30  |
| HADS-A <sub>3</sub>                                     | 0.04             | p=0.946 | -1.05, 1.12  |
| <b>Adjusted (n=2910)</b>                                |                  |         |              |
| HADS-D <sub>1</sub>                                     | 0.38             | p<.001  | 0.21, 0.55   |
| HADS-D <sub>2</sub>                                     | -1.69            | p=0.004 | -2.84, -0.54 |
| HADS-D <sub>3</sub>                                     | 2.94             | p=0.006 | 0.86, 5.02   |
| HADS-A <sub>1</sub>                                     | -0.02            | p=0.666 | -0.11, 0.07  |
| HADS-A <sub>2</sub>                                     | 0.01             | p=0.973 | -0.37, 0.38  |
| HADS-A <sub>3</sub>                                     | -0.15            | p=0.788 | -1.24, 0.94  |

### Colorectal cancer – females

| Predictor variable                                      | Log hazard ratio | p-value | 95% CI       |
|---------------------------------------------------------|------------------|---------|--------------|
| <b>Unadjusted (n=1154 for HADS-D and HADS-A models)</b> |                  |         |              |
| HADS-D <sub>1</sub>                                     | 0.21             | p=0.131 | -0.06, 0.48  |
| HADS-D <sub>2</sub>                                     | -0.60            | p=0.530 | -2.48, 1.27  |
| HADS-D <sub>3</sub>                                     | 0.90             | p=0.605 | -2.50, 4.29  |
| HADS-A <sub>1</sub>                                     | -0.16            | p=0.073 | -0.33, 0.01  |
| HADS-A <sub>2</sub>                                     | 0.78             | p=0.055 | -0.02, 1.58  |
| HADS-A <sub>3</sub>                                     | -1.66            | p=0.062 | -3.40, 0.08  |
| <b>Adjusted (n=1154)</b>                                |                  |         |              |
| HADS-D <sub>1</sub>                                     | 0.30             | p=0.038 | 0.02, 0.57   |
| HADS-D <sub>2</sub>                                     | -1.02            | p=0.290 | -2.91, 0.87  |
| HADS-D <sub>3</sub>                                     | 1.63             | p=0.351 | -1.79, 5.05  |
| HADS-A <sub>1</sub>                                     | -0.23            | p=0.010 | -0.41, -0.06 |
| HADS-A <sub>2</sub>                                     | 0.89             | p=0.031 | 0.08, 1.70   |
| HADS-A <sub>3</sub>                                     | -1.85            | p=0.039 | -3.61, -0.09 |

### Lung cancer – females

| Predictor variable                                      | Log hazard ratio | p-value | 95% CI      |
|---------------------------------------------------------|------------------|---------|-------------|
| <b>Unadjusted (n=2041 for HADS-D and HADS-A models)</b> |                  |         |             |
| HADS-D <sub>1</sub>                                     | 0.11             | p=0.003 | 0.04, 0.18  |
| HADS-D <sub>2</sub>                                     | -0.25            | p=0.142 | -0.59, 0.08 |
| HADS-D <sub>3</sub>                                     | 0.49             | p=0.170 | -0.21, 1.20 |
| HADS-A <sub>1</sub>                                     | 0.07             | p=0.041 | 0.00, 0.13  |
| HADS-A <sub>2</sub>                                     | -0.17            | p=0.114 | -0.39, 0.04 |
| HADS-A <sub>3</sub>                                     | 0.47             | p=0.143 | -0.16, 1.10 |
| <b>Adjusted (n=2041)</b>                                |                  |         |             |
| HADS-D <sub>1</sub>                                     | 0.12             | p=0.002 | 0.04, 0.19  |
| HADS-D <sub>2</sub>                                     | -0.25            | p=0.154 | -0.59, 0.09 |
| HADS-D <sub>3</sub>                                     | 0.48             | p=0.184 | -0.23, 1.19 |
| HADS-A <sub>1</sub>                                     | 0.02             | p=0.529 | -0.05, 0.09 |
| HADS-A <sub>2</sub>                                     | -0.14            | p=0.209 | -0.36, 0.08 |
| HADS-A <sub>3</sub>                                     | 0.39             | p=0.231 | -0.25, 1.02 |

**Appendix G: Plots of the estimated hazard ratios for depression at three levels of anxiety (left panel) and estimated hazard ratios for anxiety at three levels of depression (right panel) relative to a participant with breast cancer with HADS-D/HADS-A equal to zero.**

Predicted hazard ratios for depression severity (at HADS-A=0, 5 and 10) and anxiety severity (at HADS-D=0, 5 and 10) for those with breast cancer are shown below. There was no evidence that a model with all the products of the linear term for depression and cubic spline terms for anxiety and vice-versa fitted better than a simpler model with just the product of the linear terms. Therefore, we present the results from this simpler model. The figure shows a difference in the shapes of the relationship between anxiety and hazard of mortality (with a change in the association with increasing anxiety, from close to zero to protective, as depression increases). Differences in the shape of the relationship between depression and hazard of mortality across levels of anxiety were less stark, with a slightly stronger estimated relationship at lower levels of anxiety.

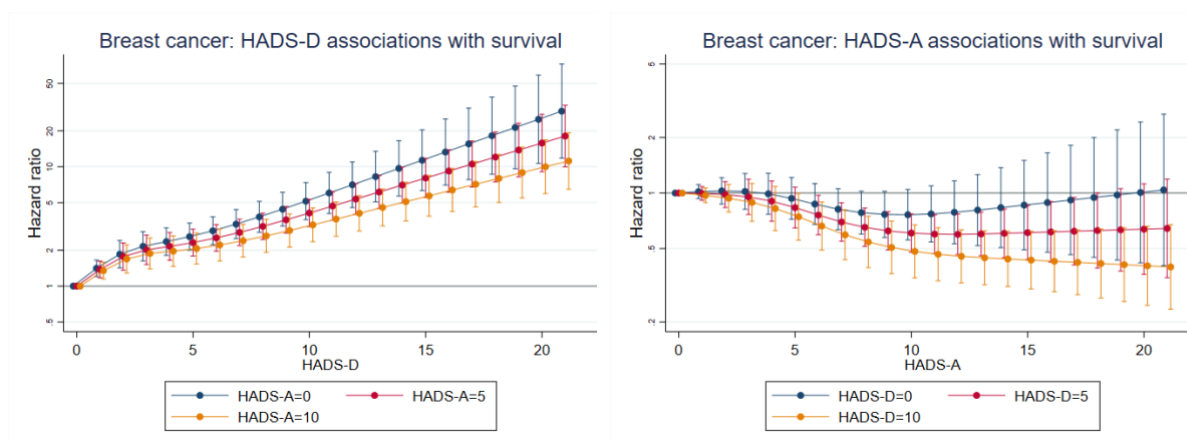

Supplement: EMS181444-supplement-Appendix.pdf [file EMS181444-supplement-Appendix.pdf]
